# Supplementary material for: Developing a highly efficient hydroxytyrosol whole-cell catalyst by de-bottlenecking rate-limiting steps
Source: PubMed Central journal article supplement (PMC7090077; doi:10.1038/s41467-020-14918-5), 2020-03-23
Supplement: 41467_2020_14918_MOESM3_ESM.pdf [file 41467_2020_14918_MOESM3_ESM.pdf]

## **Description of Additional Supplementary Files**

File name: Supplementary Data 1

Description: Strains and plasmids used in this study

File name: Supplementary Data 2

Description: Primers used in this study

File name: Supplementary Data 3

Description: Sequence of the genes after codon optimization
